# Supplementary material
Source: PubMed Central journal article supplement (PMC5562270)
Supplement: NIHMS59898-supplement-Appendix.pdf [file NIHMS59898-supplement-Appendix.pdf]

## APPENDIX

**TABLE A1** Questions and Weights Given to Each Response

| Questions                                                                                                                                                                                              | Response categories       | Weights given to each response |
|--------------------------------------------------------------------------------------------------------------------------------------------------------------------------------------------------------|---------------------------|--------------------------------|
| 1. Do you have any full-time or part-time maid in your house to help you?                                                                                                                              | No                        | 1                              |
|                                                                                                                                                                                                        | Yes, part-time            | 2                              |
|                                                                                                                                                                                                        | Yes, full-time            | 3                              |
| 2. Mostly who does the following household activities?<br><ul style="list-style-type: none"> <li>• Sweeping and swabbing</li> <li>• Utensils cleaning</li> <li>• Cooking</li> <li>• Washing</li> </ul> | Done by women             | 1                              |
|                                                                                                                                                                                                        | Done by women with others | 2                              |
|                                                                                                                                                                                                        | Done by others            | 3                              |
|                                                                                                                                                                                                        |                           |                                |
| 3. How much time do you devote to watching television during a normal day?                                                                                                                             | < 1 h/day                 | 1                              |
|                                                                                                                                                                                                        | 1–2 h/day                 | 2                              |
|                                                                                                                                                                                                        | > 2 h/day                 | 3                              |

**TABLE A2** Distribution of Sedentary Lifestyle Index Along with Scores, Mean, *SD*, and Cut-Off Points of Indices

| Levels of sedentary lifestyle | Score range (6–17) | Percentage of women | Number of women |
|-------------------------------|--------------------|---------------------|-----------------|
| Low                           | 6–8                | 44.6                | 145             |
| Medium                        | 9–12               | 33.5                | 109             |
| High                          | 13–17              | 21.8                | 71              |
| Mean                          | 9.96               |                     |                 |
| <i>SD</i>                     | 3.02               |                     |                 |

**TABLE A3** Calculation of Weight

| Categories of sample | Sample in NFHS-2 Urban Delhi N | Proportion of NFHS-2 Urban Delhi P1 | Sample selected for follow-up survey n1 | Proportion of sample selected for follow-up survey P2 | Sample found in follow-up survey n2 | Response rate R | Probability of selection from sample P3 | Joint probability (with response rate) JP | Weight (1/JP) Wt1 | Normalized weight (Wt1 × n/N) Wt |
|----------------------|--------------------------------|-------------------------------------|-----------------------------------------|-------------------------------------------------------|-------------------------------------|-----------------|-----------------------------------------|-------------------------------------------|-------------------|----------------------------------|
|                      |                                |                                     |                                         |                                                       |                                     |                 |                                         |                                           |                   |                                  |
| Normal               | 1117                           | 0.613736                            | 217                                     | 0.364706                                              | 113                                 | 0.520737        | 0.194270                                | 0.101164                                  | 9.884956          | 1.830346                         |
| Overweight           | 500                            | 0.274725                            | 227                                     | 0.381513                                              | 124                                 | 0.546256        | 0.454000                                | 0.248000                                  | 4.032258          | 0.746632                         |
| Obese                | 203                            | 0.111538                            | 151                                     | 0.253782                                              | 100                                 | 0.662252        | 0.743842                                | 0.492611                                  | 2.030000          | 0.375885                         |
| Total                | 1820                           | 1.00                                | 595                                     | 1.00                                                  | 337                                 | —               | —                                       | —                                         | —                 | —                                |
